# Supplementary material
Source: Springer Nature journal article supplement (https://www.springermedizin.de/resource/supplementary/12885_2013_4840_MOESM2_ESM.pdf/9467480)
Supplement: MOESM2 [file 9467480]

851 e-mails sent

106 failures  
4 requested removal

741 invitation emails sent

138 participants answered  
18.6% participation rate
